# Supplementary material for: The landscape of antibody binding affinity in SARS-CoV-2 Omicron BA.1 evolution
Source: eLife. 2023 Feb 21;12:e83442. doi: 10.7554/eLife.83442 (PMC9949795; doi:10.7554/eLife.83442)
Supplement: Supplementary file 1. — The KD,app inferred from isogenic measurements (see Methods) shown with those inferred via Tite-seq measurement. NB denotes non-binding and SDs between replicates are also shown. [file elife-83442-supp1.docx]

| Strain | Antibody | Isogenic -log *K*D,app | TiteSeq -log *K*D,app |
| --- | --- | --- | --- |
| Omicron BA.1 | LY-CoV016 | NB | NB |
| Omicron BA.1 | LY-CoV555 | NB | NB |
| Omicron BA.1 | REGN10987 | NB | NB |
| Omicron BA.1 | S309 | 8.81 | 8.62  0.18 |
| Wuhan Hu-1 | LY-CoV016 | 10.52  0.24 | 10.27  0.07 |
| Wuhan Hu-1 | LY-CoV555 | 10.01  0.33 | 10.35  0.02 |
| Wuhan Hu-1 | REGN10987 | 10.42  0.49 | 10.52  0.18 |
| Wuhan Hu-1 | S309 | 9.33  0.27 | 9.00  0.08 |
